# Supplementary figures and images for: Natural deep eutectic solvents (NADES) for the extraction of bioactives: emerging opportunities in biorefinery applications
Source: PeerJ journal article supplement (doi:10.7717/peerj-achem.32), 2024-04-04

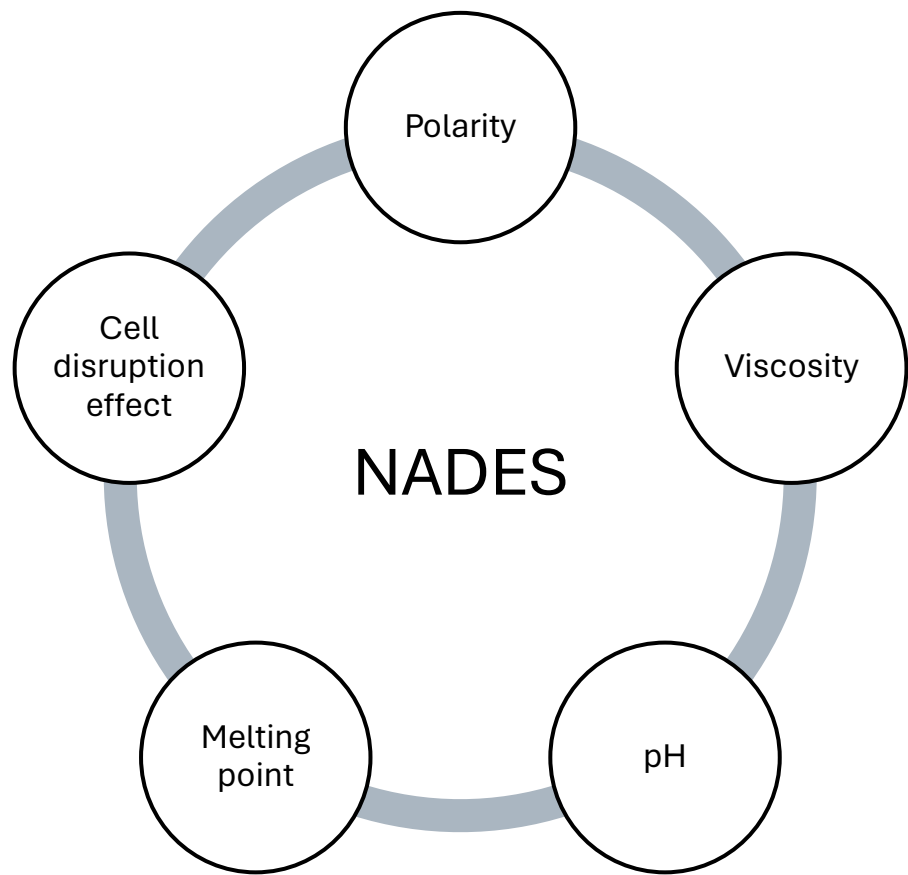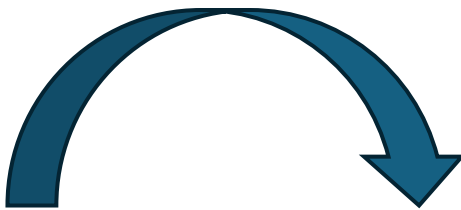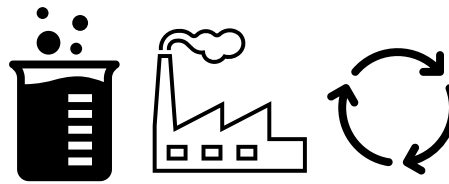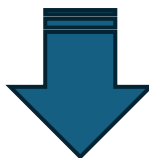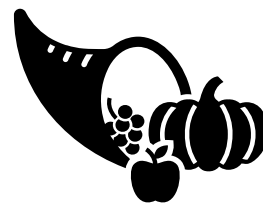

- Proteins
- Pigments
- Lipids
- Phenolics

Supplement: Graphical_abstract_upd.pdf [file Graphical_abstract_upd.pdf]
